# Supplementary material for: Biological Control Activity of Plant Growth Promoting Rhizobacteria Burkholderia contaminans AY001 against Tomato Fusarium Wilt and Bacterial Speck Diseases
Source: MDPI journal article supplement (doi:10.3390/biology11040619), 2022-04-18
Supplement: s1 [file s1]

**Supplementary Table S1.** The list of Real-time qRT-PCR primers used in this study

| Gene  | Primer Sequence (5' to 3') |                                               | Amplicon size (bp) | Reference             |
|-------|----------------------------|-----------------------------------------------|--------------------|-----------------------|
| Actin | F:<br>R:                   | TCAGCAACTGGGATGATATG<br>TTAGGGTTGAGAGGTGCTTC  | 112                | Milling et al., 2011. |
| PIN2  | F:<br>R:                   | CATCTTCTGGATTGCCCA<br>ACACACAACCTTGATGCCAC    | 106                | Li et al., 2014.      |
| LapA  | F:<br>R:                   | GGGACTAATGATGTTTGGAA<br>GTGGCAATTTTATTTAGGCA  | 109                | Li et al., 2014.      |
| ACO1  | F:<br>R:                   | TTGCTCATTTTCCTTTGTGGA<br>GGAAGCTAGCAAAGCAAACC | 122                | Jia et al., 2013.     |

**Supplementary Table S2.** Summary of PGPR-related trait of AY1001

| PGP trait                | AY001 |
|--------------------------|-------|
| Phosphate solubilization | +     |
| Protease activity        | +     |
| Amylase activity         | -     |
| Siderophore              | +     |
| Nitrogen fixation        | +     |
| Zinc solubilization      | +     |
| Cellulase activity       | -     |
| Chitinase activity       | -     |
| IAA production           | +     |
| Ammonia production       | +     |

**Supplementary Table S3.** Qualitative analysis of zinc and phosphate solubilization and protease efficiency of AY001 at 10 dai (Mean ± SD)

| Incubation time | Total diameter (mm)<br>(Colony + Halo zone) |                          |                   | Solubilization index (SI)<br>and<br>Hydrolysis index (HI) |                          |                   |
|-----------------|---------------------------------------------|--------------------------|-------------------|-----------------------------------------------------------|--------------------------|-------------------|
|                 | Zinc solubilization                         | Phosphate solubilization | Protease activity | Zinc solubilization                                       | Phosphate solubilization | Protease activity |
| Day 3           | 19.85±0.09                                  | 12.67±1.15               | 15.83±0.76        | 1.99                                                      | 1.27                     | 1.58              |
| Day 5           | 22±0.09                                     | 16.67±1.26               | 33.83±0.29        | 2.13                                                      | 1.52                     | 2.78              |
| Day 7           | 24.96±0.03                                  | 19.33±2.25               | 39.5±0.5          | 2.24                                                      | 1.73                     | 2.96              |
| Day 10          | 26.5±0.13                                   | 24.83±1.04               | 46.83±0.29        | 2.24                                                      | 2.22                     | 3.01              |

## References

- Milling, A., Babujee, L., and Allen, C. (2011). *Ralstonia solanacearum* Extracellular Polysaccharide Is a Specific Elicitor of Defense Responses in Wilt-Resistant Tomato Plants. *PLoS One* 6, e15853. doi: 10.1371/journal.pone.0015853
- Li, X., Huang, L., Zhang, Y. et al. (2014). Tomato SR/CAMTA transcription factors SISR1 and SISR3L negatively regulate disease resistance response and SISR1L positively modulates drought stress tolerance. *BMC Plant Biol.* 14, 286. doi: 10.1186/s12870-014-0286-3
- Jia, C., Zhang, L., Liu, L., Wang, J., Li, C., and Wang, Q. (2013). Multiple phytohormone signalling pathways modulate susceptibility of tomato plants to *Alternaria alternata* f. sp. *lycopersici*. *J. Exp. Bot.* 64, 637–650, doi: 10.1093/jxb/ers360

**A**

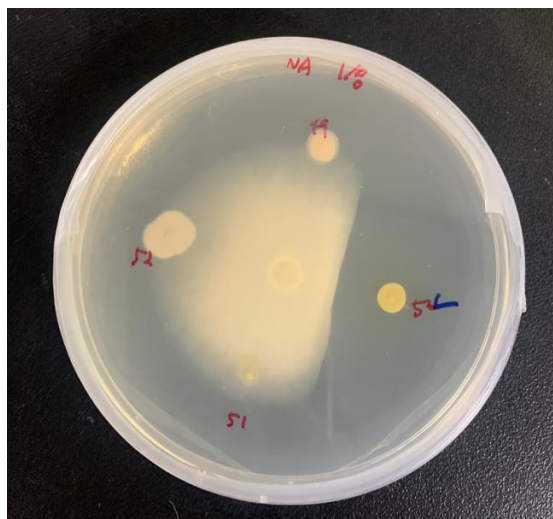

**B**

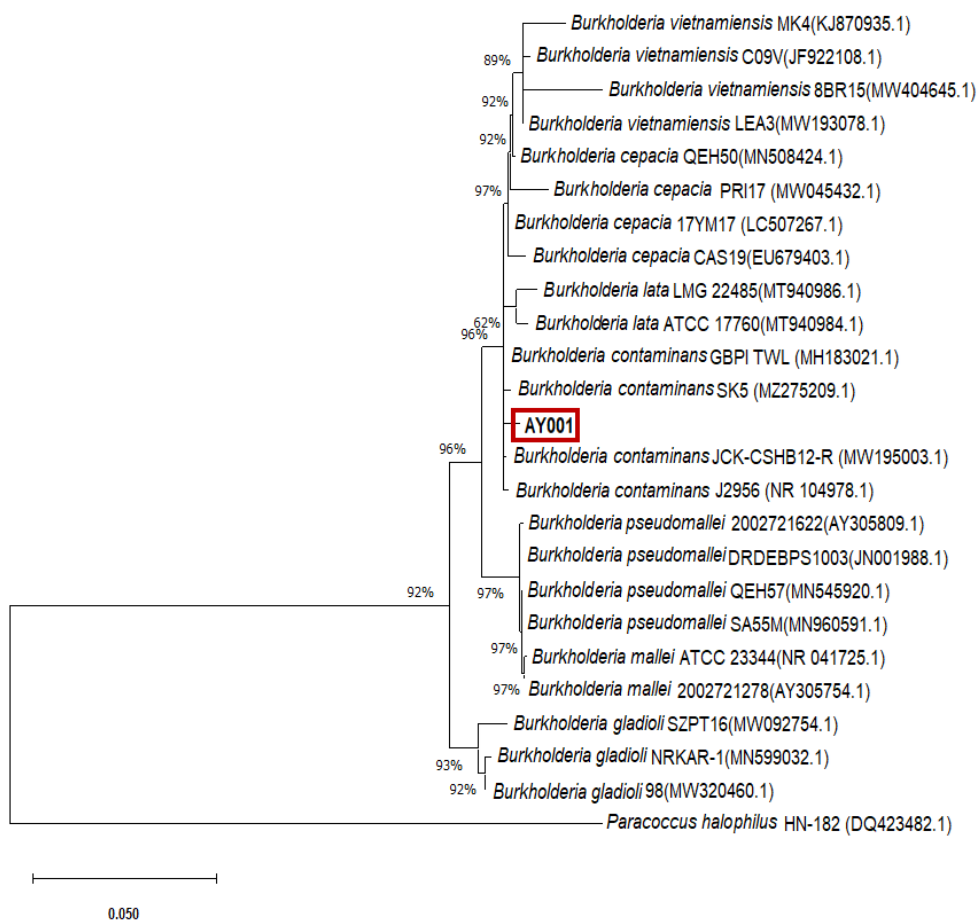

**Supplementary Figure S1.** Isolation and identification of antagonistic bacterium AY001 against *Fusarium oxysporum* f.sp. *lycopersici* (FOL). **(A)** Isolation of AY001 showing antagonistic effect against FOL from PDA media. **(B)** Molecular identification of AY001 as *Burkholderia contaminans*. Phylogenetic analysis of 16s rDNA of AY001 with other *Burkholderia* spp. Phylogenetic tree were generated by Maximum Likelihood method analysis of 16S rRNA gene nucleotide sequences of *Burkholderia* species in MEGA X program.
